# Supplementary material
Source: HighWire-hosted journal article supplement (https://embor.embopress.org/content/embr.201338003/F3)

Figure 3E

GABARAP  
Top panel  
(Mw illustrated in Supplementary  
figures (CBB))

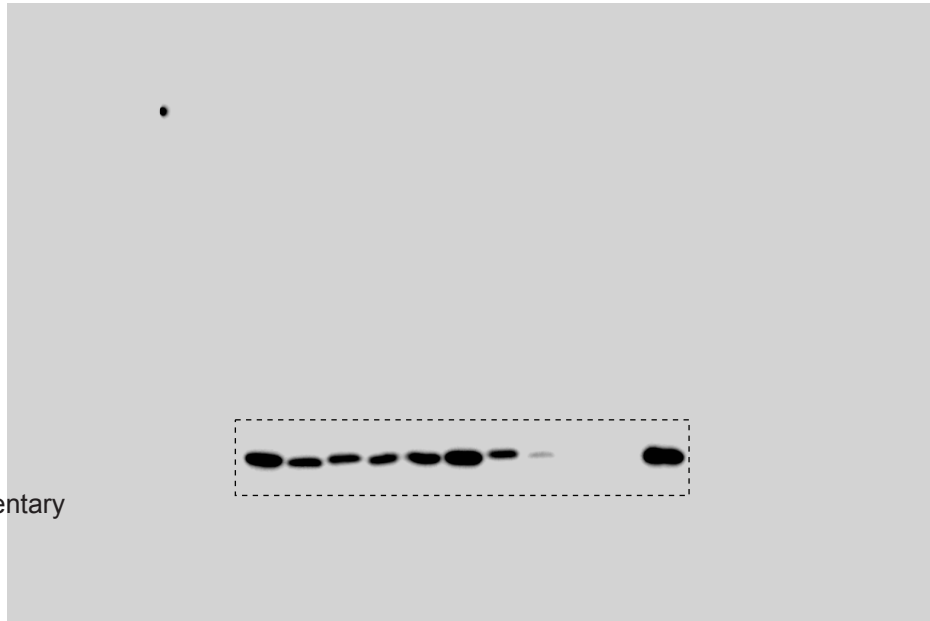

Figure 3E

MBP  
Lower panel  
(Mw illustrated in Supplementary  
figures (CBB))

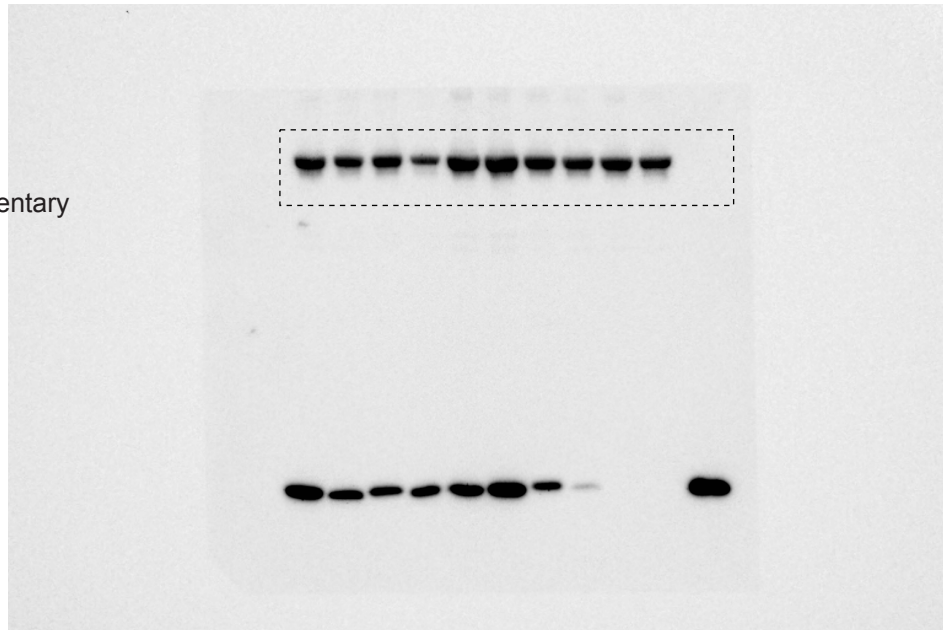

Supplement: inline-supplementary-material-8 [file inline-supplementary-material-8.pdf]
